# Supplementary material for: Simultaneous photocatalytic tetracycline oxidation and chromate reduction via a jointed synchronous pathway upon Z-scheme Bi12O17Cl2/AgBr: insight into intermediates and mechanism
Source: Royal Society of Chemistry journal article supplement (doi:10.1039/d2en00028h), 2022-01-01
Supplement: d2en00028h1.pdf [file d2en00028h1.pdf]

## **Supplementary Material**

### **Simultaneous photocatalytic tetracycline oxidation and chromate reduction via a jointed synchronous pathway upon Z-scheme Bi<sub>12</sub>O<sub>17</sub>Cl<sub>2</sub>/AgBr: Insight into intermediates and mechanism**

Zicheng Zhai<sup>1</sup>, Kaixu Ren<sup>1</sup>, Xiangyang Zheng<sup>1</sup>, Yigang Chen<sup>2, \*</sup>, Yuming Dong<sup>3</sup>,  
Haifeng Shi<sup>1, 4, \*</sup>

<sup>1</sup> School of Science, Jiangnan University, Wuxi, 214122, P. R. China

<sup>2</sup> Department of General Surgery, The Affiliated Wuxi No.2 People's Hospital of Nanjing Medical University, Wuxi, 214002, P. R. China

<sup>3</sup> School of Chemical & Material Engineering, Jiangnan University, Wuxi, 214122, PR China

<sup>4</sup> National Laboratory of Solid State Microstructures, Nanjing University, Nanjing, 210093, P. R. China.

---

\* E-mail addresses: [wuxichen2512@njmu.edu.cn](mailto:wuxichen2512@njmu.edu.cn) (Y. Chen), [hfshi@jiangnan.edu.cn](mailto:hfshi@jiangnan.edu.cn) (H. Shi).

#### Determination of degradation intermediates:

The degradation products of TC were identified by the liquid chromatography-mass spectrometry (LC-MS) system. LC-MS was performed with an Agilent Technologies 6470 Triple Quad LC/MS system. The detection conditions were as follows: the capillary potential of 3.5 kV, cone voltage of 30 V. Nitrogen was used as the nebulizer gas. The column temperature was thermostated at 30°C. The mobile phase comprised buffer A (HPLC grade water + 0.1% (v/v) formic acid) and buffer B (HPLC grade acetonitrile). The flow rate was 0.2 mL/min. The eluent gradient started with 10% of eluent B gradually increasing to 90% in 10 min, and the system was then kept for 4 min, returning to 10% in 1 min and equilibrating for 1 min (returning to initial condition and re-equilibrating the column). Mass spectrometry (MS) analysis was performed in a positive mode. The mass range was 70-800 (m/z)

**Table S1.** Comparison of relative researches of simultaneous Cr (VI) reduction (a) and organics oxidation results with our work.

(a):

| Photocatalyst                  | Concentration<br>(Cr (VI), mg/L <sup>-1</sup> ) | Dosage<br>(g/L <sup>-1</sup> ) | Time<br>(min) | Removal<br>(%) | Rate<br>(min <sup>-1</sup> ) | Light<br>Source                               | Ref.                |
|--------------------------------|-------------------------------------------------|--------------------------------|---------------|----------------|------------------------------|-----------------------------------------------|---------------------|
| TiO <sub>2</sub> /BiOCl<br>45% | 15                                              | 1                              | 180           | 98             | 0.0189                       | 300 W XL<br>(λ ≥ 400 nm)                      | 1                   |
| BiVO <sub>4</sub> -4           | 10                                              | 1                              | 90            | 83.42          | —                            | 300 W XL<br>(λ ≥ 420 nm)                      | 2                   |
| 0.3-AgI/BiVO <sub>4</sub>      | 15                                              | 0.4                            | 100           | ~70            | —                            | 500W XL<br>(λ ≥ 420nm)                        | 3                   |
| 1.5 ZnO/rGO                    | 20                                              | 0.5                            | 120           | —              | 0.0159                       | two non-<br>halogen<br>lamps (24<br>V, 250 W) | 4                   |
| MP9%<br>(pH = 2.0)             | 10                                              | 0.25                           | 120           | 100            | —                            | 300 W XL                                      | 5                   |
| <b>B<sub>12</sub>/AB 1:1</b>   | <b>10</b>                                       | <b>0.5</b>                     | <b>60</b>     | <b>92.6</b>    | <b>0.0442</b>                | <b>300W XL</b><br><b>(λ ≥ 420 nm)</b>         | <b>Our<br/>work</b> |

(b):

| Photocatalyst                  | Concentration<br>(mg/L <sup>-1</sup> ) | Dosage<br>(g/L <sup>-1</sup> ) | Time<br>(min) | Removal<br>(%) | Rate<br>(min <sup>-1</sup> ) | Light<br>Source                               | Ref                 |
|--------------------------------|----------------------------------------|--------------------------------|---------------|----------------|------------------------------|-----------------------------------------------|---------------------|
| TiO <sub>2</sub> /BiOCl<br>45% | 30                                     | 1                              | 240           | 97             | 0.0115                       | 300W XL<br>(λ ≥ 400 nm)                       | 1                   |
| BiVO <sub>4</sub> -4           | 20                                     | 1                              | 90            | 81.22          | —                            | 300W XL<br>(λ ≥ 420 nm)                       | 2                   |
| 0.3-AgI/BiVO <sub>4</sub>      | 20                                     | 0.4                            | 100           | ~88            | —                            | 500W XL<br>(λ ≥ 420nm)                        | 3                   |
| 1.5 ZnO/rGO                    | 20                                     | 0.5                            | 120           | —              | 0.0096                       | two non-<br>halogen<br>lamps (24<br>V, 250 W) | 4                   |
| MP9%<br>(pH = 2.0)             | 10                                     | 0.25                           | 120           | 84             | —                            | 300W XL                                       | 5                   |
| <b>B<sub>12</sub>/AB 1:1</b>   | <b>50</b>                              | <b>0.5</b>                     | <b>60</b>     | <b>74.83</b>   | <b>0.0275</b>                | <b>300W XL<br/>(λ ≥ 420nm)</b>                | <b>Our<br/>work</b> |

**Table S2** Possible degradation intermediates identified by LC-MS.

| Number | Formula                 | RT (min) | m/z    | Proposed structure                                                                   |
|--------|-------------------------|----------|--------|--------------------------------------------------------------------------------------|
| TC     | $C_{22}H_{24}N_2O_8$    | 5.10     | 445.02 | 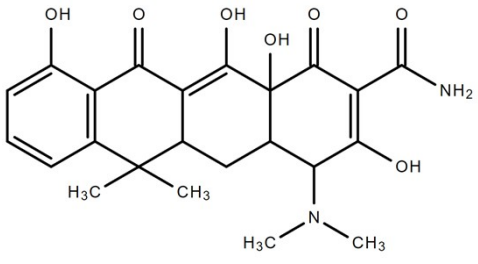   |
| P1     | $C_{22}H_{24}N_2O_9$    | 5.30     | 459.13 |   |
| P2     | $C_{22}H_{24}N_2O_{10}$ | 4.09     | 476.16 |  |
| P3     | $C_{18}H_{18}NO_7$      | 3.66     | 362.13 |  |

---

P4       $C_{15}H_9O_{11}$       2.09      373.06

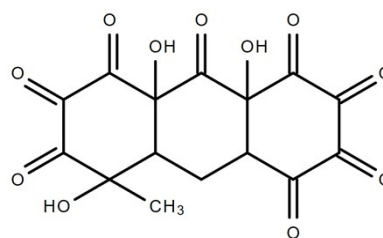

P5       $C_{16}H_{20}O_8$       4.56      340.18

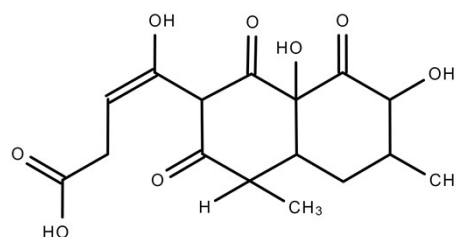

P6       $C_{23}H_{24}N_2O_{11}$       8.61      516.11

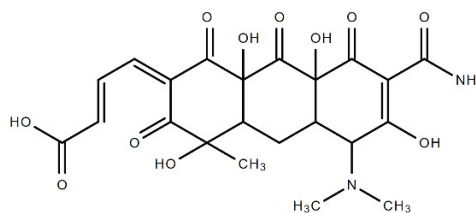

P7       $C_{23}H_{24}N_2O_{12}$       7.97      521.21

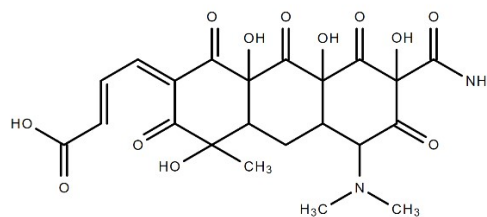

P8       $C_{21}H_{17}NO_{12}$       6.39      488.94

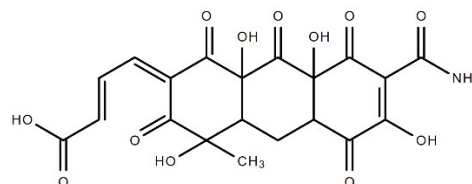

---

|     |                 |      |        |  |
|-----|-----------------|------|--------|--|
| P9  | $C_{10}H_4O_8$  | 5.47 | 262.17 |  |
| P10 | $C_8H_6O_8$     | 3.21 | 240.12 |  |
| P11 | $C_{10}H_{12}O$ | 8.61 | 218.18 |  |
| P12 | $C_3H_2O_5$     | 9.70 | 114.63 |  |
| P13 | $C_2H_2O_4$     | 9.33 | 90.82  |  |

---

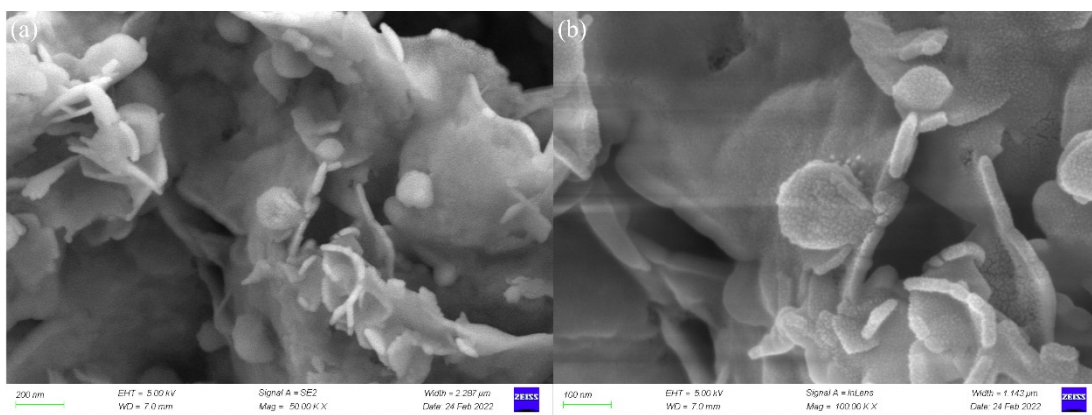

**Fig. S1.** SEM images of B<sub>12</sub>/AB 1:1.

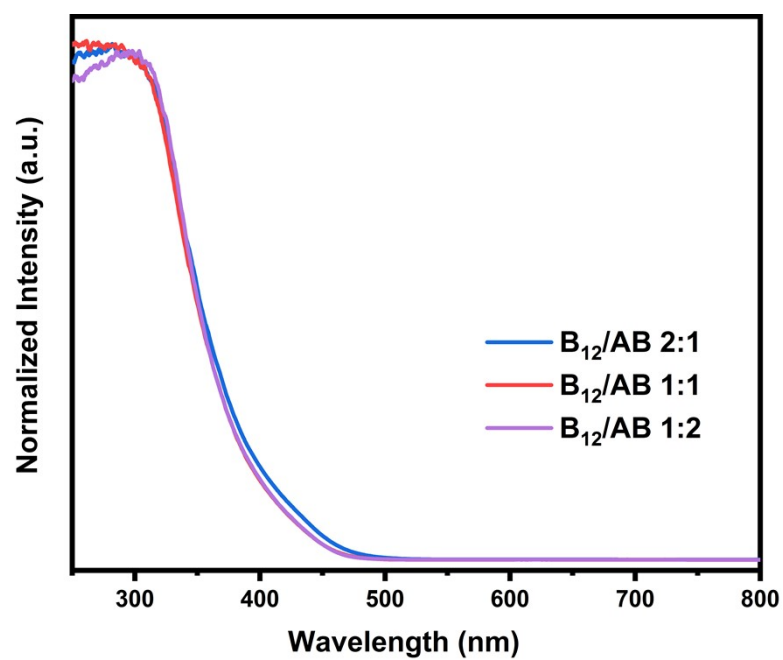

**Fig. S2.** Normalized UV Diffuse Reflectance Spectra of B<sub>12</sub>/AB x.



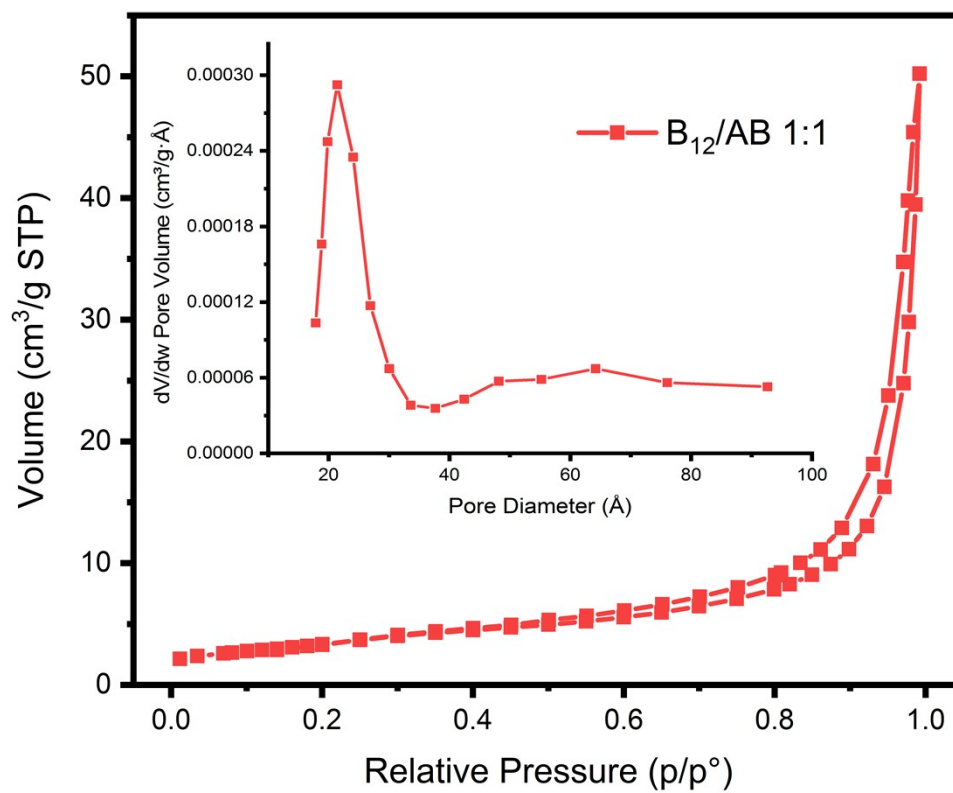

**Fig. S3.** N<sub>2</sub> adsorption-desorption isotherm of B<sub>12</sub>/AB 1:1.

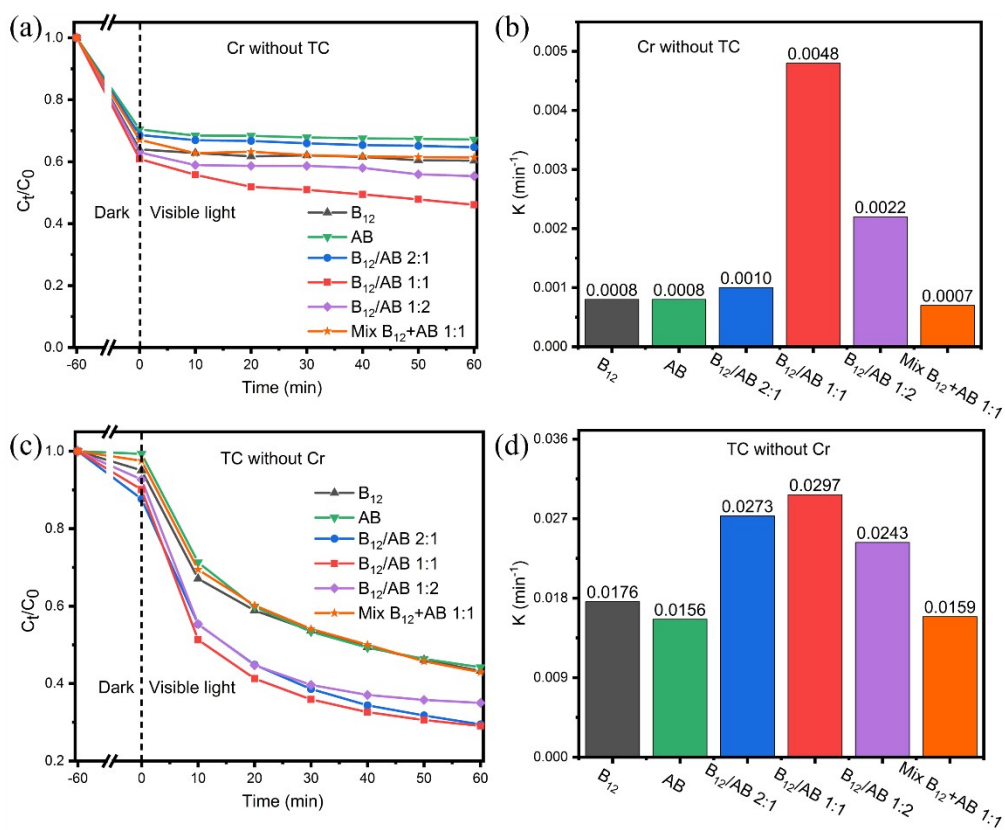

**Fig. S4.** Dynamic curves and the fitted kinetic constant  $K$  ( $\text{min}^{-1}$ ) of photocatalytic reduction of Cr (VI) (a, b), degradation of TC (c, d) in individual Cr (VI), TC solutions.

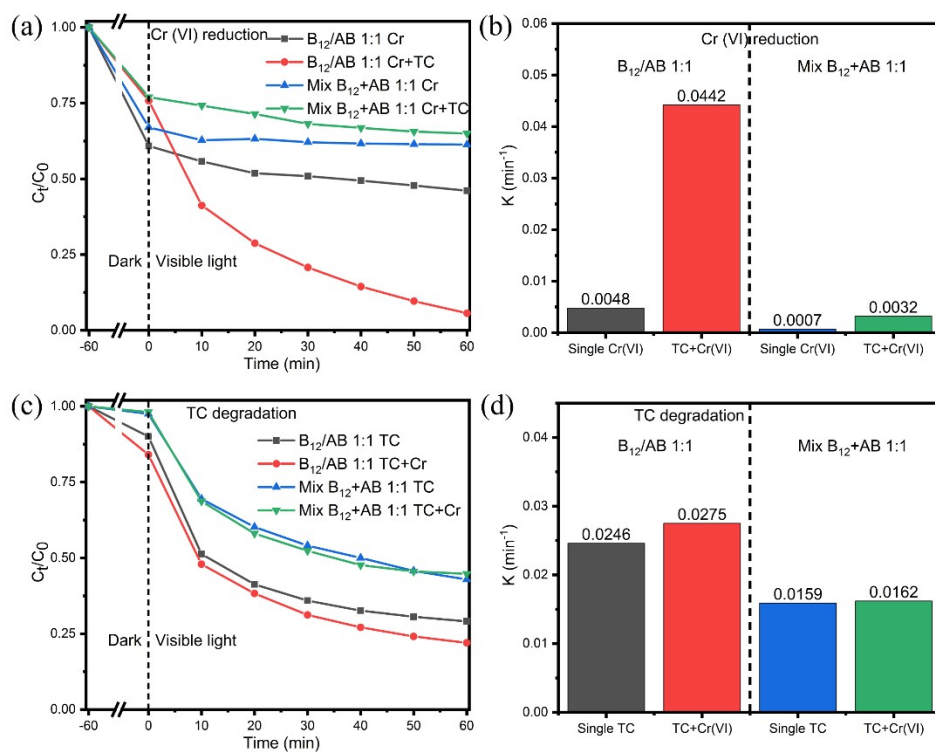

**Fig. S5.** Simultaneous removal of Cr (VI) (a, b) and TC (c, d) over  $B_{12}/AB$  1:1 and

Mix  $B_{12}+AB$  1:1

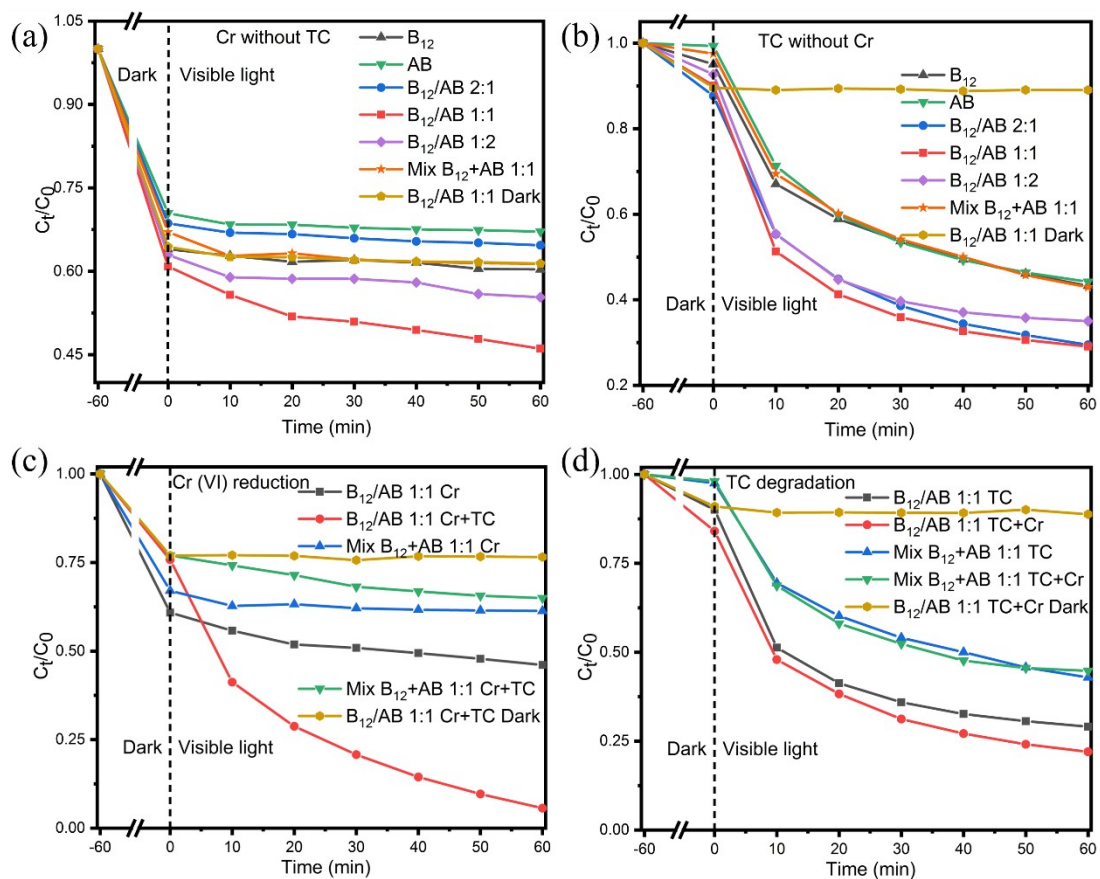

**Fig. S6.** Dynamic curves of photocatalytic activities with adsorption included.

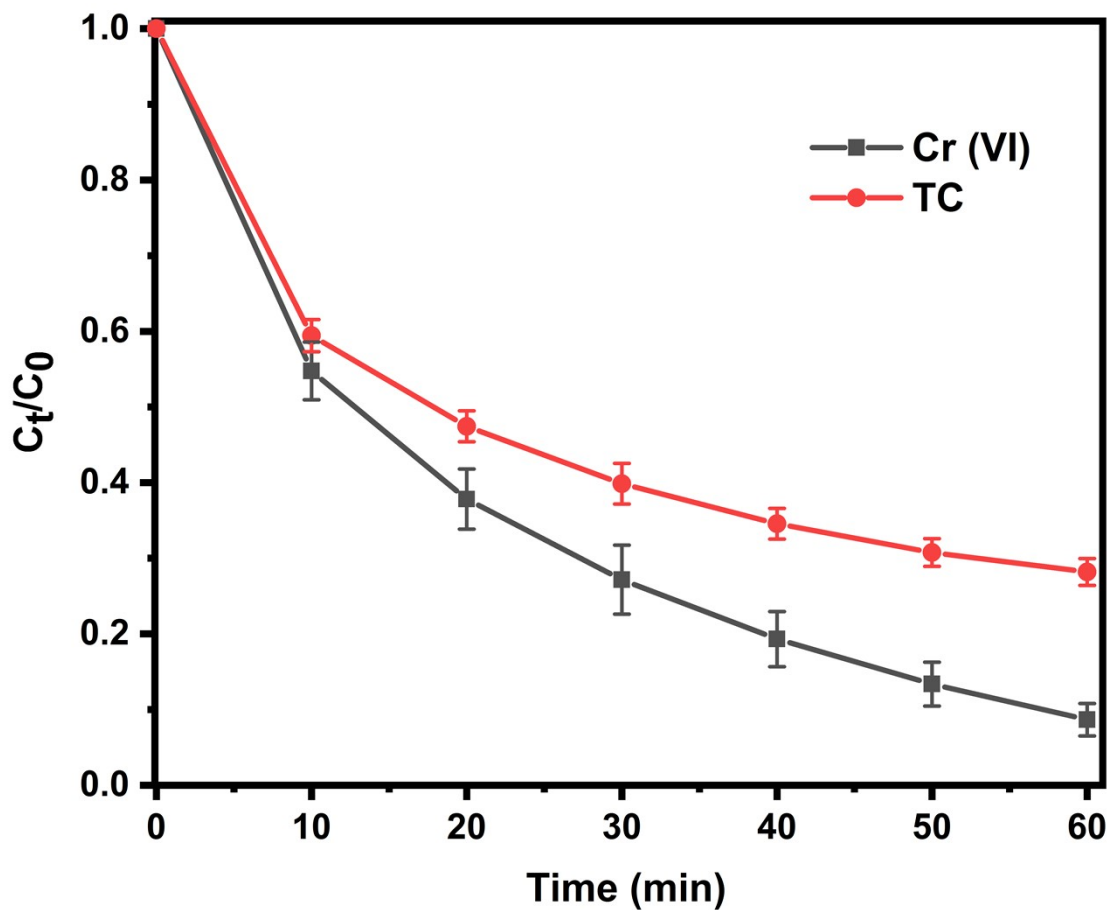

**Fig. S7.** Error curve of three-times repeated simultaneous Cr (VI) and TC removal over  $B_{12}/AB$  1:1.

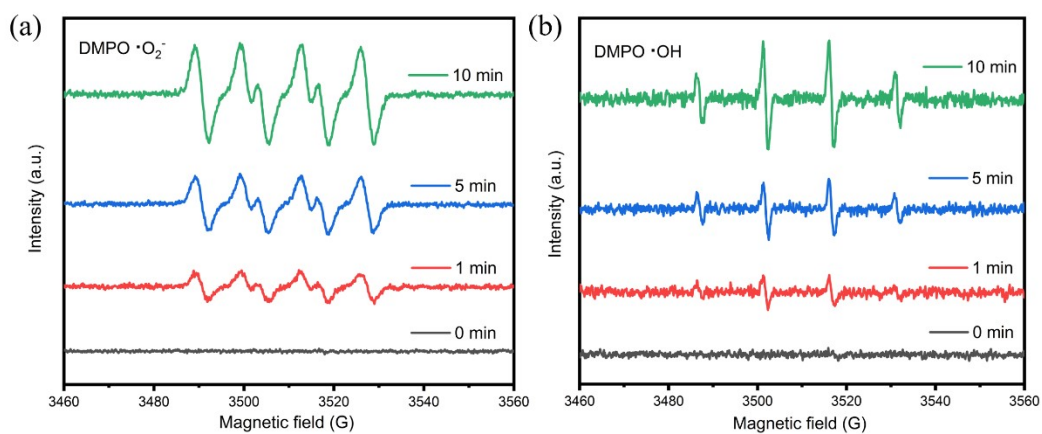

**Fig. S8.** EPR spectra of  $B_{12}/AB$  1:1 under visible light irradiation ( $\lambda \geq 420$  nm)

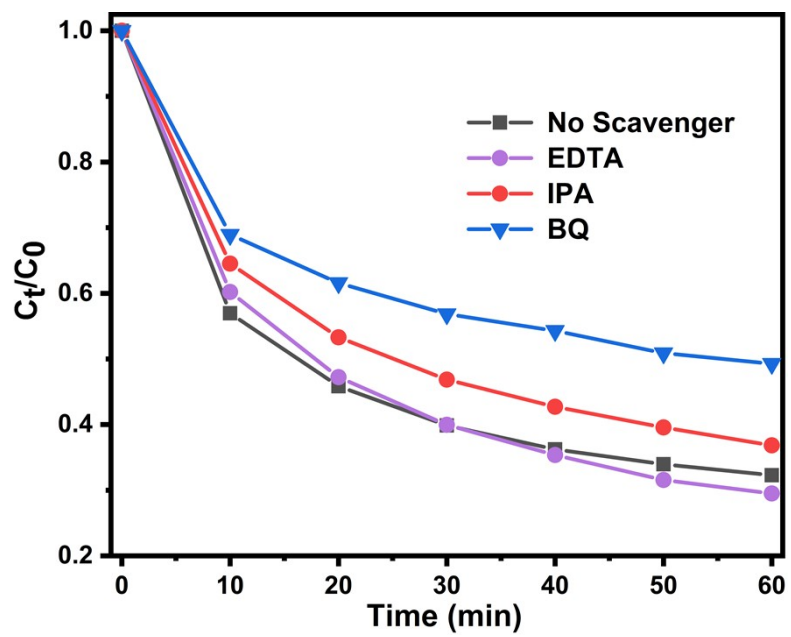

**Fig. S9.** Active species scavenger experiment of photocatalytic TC degradation over

$B_{12}/AB$  1:1

20211204-qy-z1 #300-317 RT: 2.42-2.56 AV: 18 SB: 34 0.77-1.04 NL: 7.98E7  
T: + c ESI Q1MS [85.000-800.000]

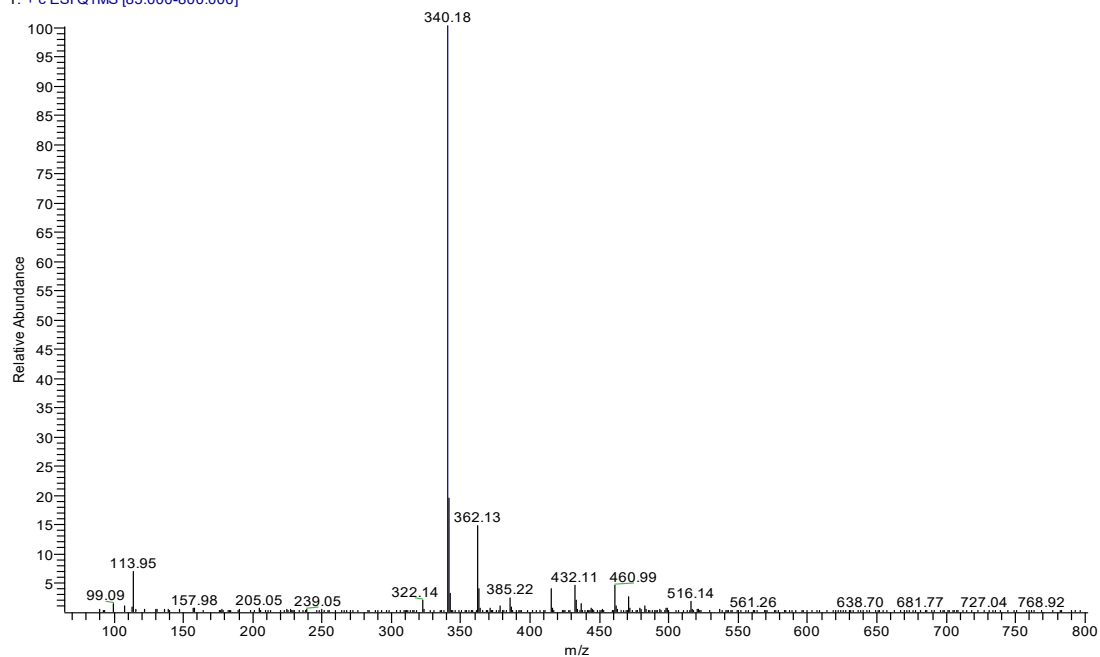

**Fig. S10.** Mass spectra of degradation intermediates of TC after 20 min degradation at 2.42-2.56 min retention time.

20211204-qy-z1 #330-359 RT: 2.66-2.90 AV: 30 SB: 34 0.77-1.04 NL: 1.48E7  
T: + c ESI Q1MS [85.000-800.000]

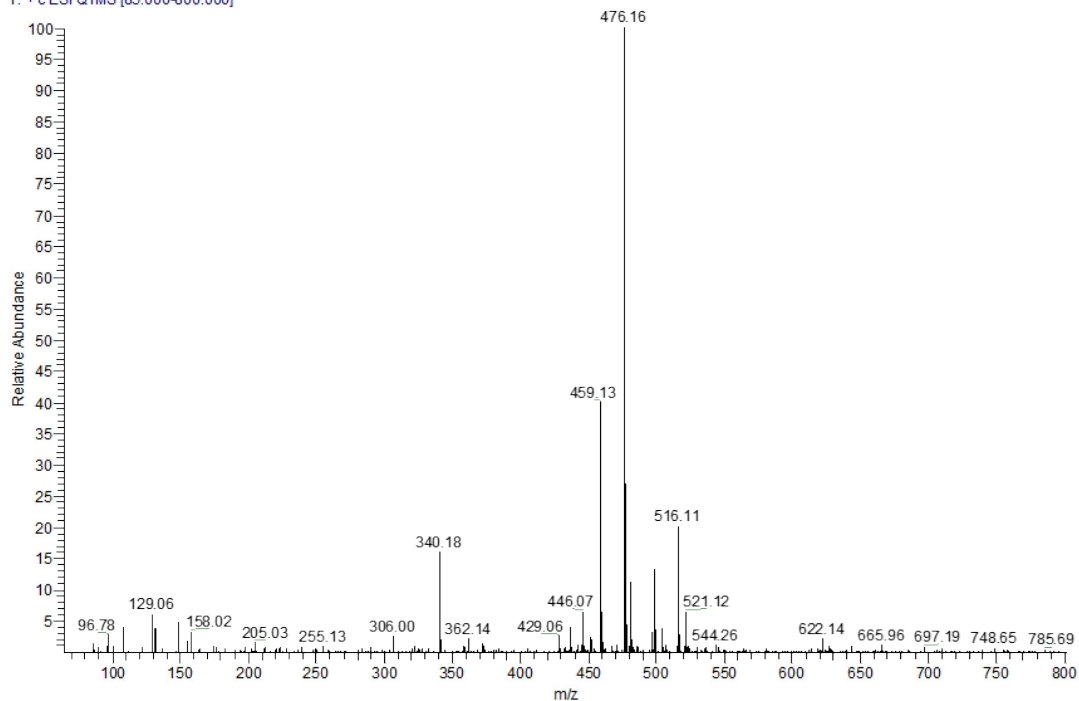

**Fig. S11.** Mass spectra of degradation intermediates of TC after 20 min degradation at 2.66-2.90 min retention time.

20211204-qy-z1 #484-502 RT: 3.91-4.06 AV: 19 SB: 34 0.77-1.04 NL: 6.03E7  
T: + c ESI Q1MS [85.000-800.000]

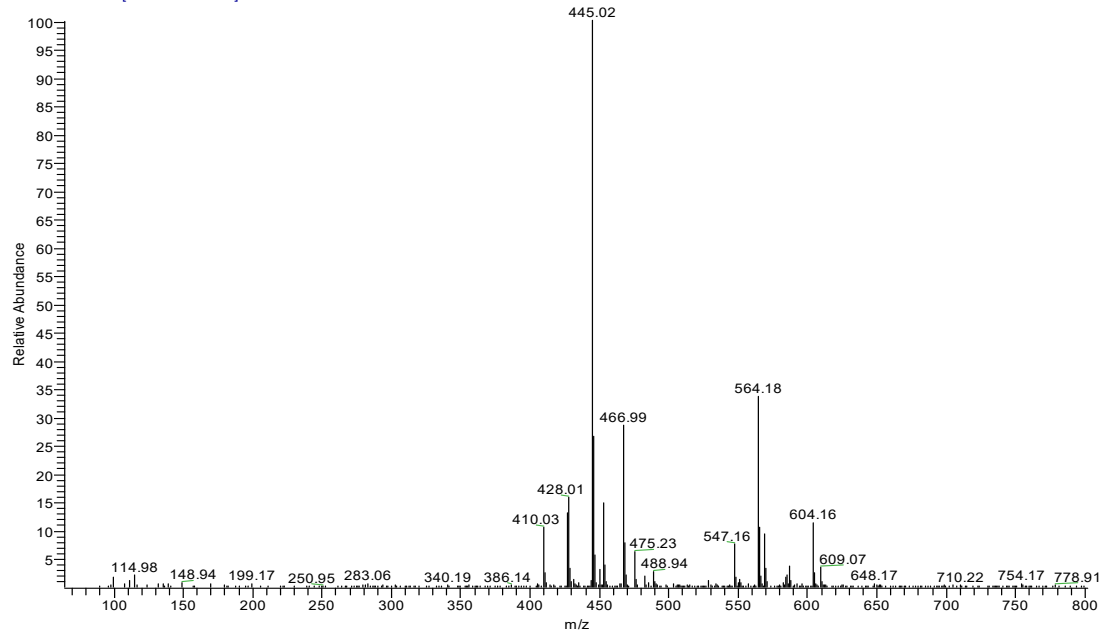

**Fig. S12.** Mass spectra of degradation intermediates of TC after 20 min degradation at 3.91-4.06 min retention time.

20211204-qy-z2 #655-676 RT: 5.30-5.47 AV: 22 SB: 40 4.68-5.00 NL: 7.45E7  
T: + c ESI Q1MS [85.000-800.000]

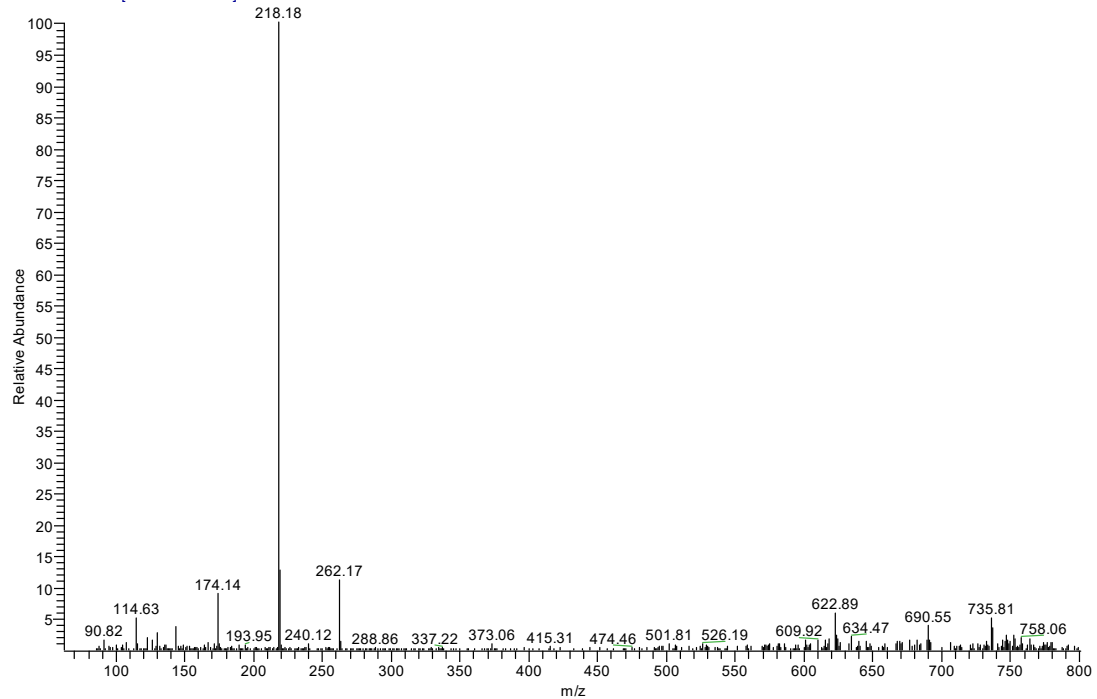

**Fig. S13.** Mass spectra of degradation intermediates of TC after 60 min degradation at 5.30-5.47 min retention time.



## REFERENCES

1. X. Hu, G. Zhang, C. Yin, C. Li and S. Zheng, Facile fabrication of heterogeneous TiO<sub>2</sub>/BiOCl composite with superior visible-light-driven performance towards Cr(VI) and tetracycline, *Mater. Res. Bull.*, 2019, **119**.
2. S. Chen, B. Li, D. Huang, P. Xu, Y. Chen, L. Lei, Z. Wang, R. Deng, L. Du and G. Wang, Jointed Synchronous Photocatalytic Oxidation and Chromate Reduction Enabled by the Defect Distribution upon BiVO<sub>4</sub>: Mechanism Insight and Toxicity Assessment, *ACS Appl. Mater. Inter.*, 2021, **13**, 17586-17598.
3. W. Zhao, J. Li, B. Dai, Z. Cheng, J. Xu, K. Ma, L. Zhang, N. Sheng, G. Mao, H. Wu, K. Wei and D. Y. C. Leung, Simultaneous removal of tetracycline and Cr(VI) by a novel three-dimensional AgI/BiVO<sub>4</sub> p-n junction photocatalyst and insight into the photocatalytic mechanism, *Chem. Eng. J.*, 2019, **369**, 716-725.
4. K. V. A. Kumar, B. Lakshminarayana, D. Suryakala and C. Subrahmanyam, Reduced graphene oxide supported ZnO quantum dots for visible light-induced simultaneous removal of tetracycline and hexavalent chromium, *Rsc Adv.*, 2020, **10**, 20494-20503.
5. D.-D. Chen, X.-H. Yi, C. Zhao, H. Fu, P. Wang and C.-C. Wang, Polyaniline modified MIL-100(Fe) for enhanced photocatalytic Cr(VI) reduction and tetracycline degradation under white light, *Chemosphere*, 2020, **245**, 125659.
